# Supplementary material for: Hyperpolarisation of Mitochondrial Membranes Is a Critical Component of the Antifungal Mechanism of the Plant Defensin, Ppdef1
Source: MDPI journal article supplement (doi:10.3390/jof10010054), 2024-01-07
Supplement: s1 [file s1]

**Table S1 . Functional enrichment of strains with increased resistance to ppdef1 identified with Funspec**

The fitness score for strains with resistance to Ppdef1 > 1.5 was analysed. Number of Genes in each Database: 6603.

**k**: number of genes from the input cluster in given category. **f**: number of genes total in given category. The p-values represent the probability that the intersection of a given list with any given functional category occurs by chance.

| Category                                                                           | P value | In category from cluster                             | k  | f   |
|------------------------------------------------------------------------------------|---------|------------------------------------------------------|----|-----|
| <b>GO molecular function</b>                                                       |         |                                                      |    |     |
| hydrogen ion transporting ATP synthase activity, rotational mechanism [GO:0046933] | 0.004   | ATP5 ATP7 ATP15                                      | 3  | 17  |
| kinase activity [GO:0016301]                                                       | 0.006   | VPS15 CHK1 FAB1 HXK2 PFK1 PTK2 VPS34 SKY1 PHO85 THI6 | 10 | 206 |
| hydrogen ion transporting ATP synthase activity, rotational mechanism [GO:0046933] | 0.004   | ATP5 ATP7 ATP15                                      | 3  | 17  |
| <b>GO biological Process</b>                                                       |         |                                                      |    |     |
| negative regulation of phosphate metabolic process [GO:0045936]                    | 0.0004  | PHO80 PHO85                                          | 2  | 2   |
| negative regulation of calcium-mediated signaling [GO:0050849]                     | 0.0004  | PHO80 PHO85                                          | 2  | 2   |
| regulation of establishment or maintenance of cell polarity [GO:0032878]           | 0.002   | PCL2 PHO85                                           | 2  | 4   |
| negative regulation of macroautophagy [GO:0016242]                                 | 0.002   | PHO80 PHO85                                          | 2  | 4   |
| sphingolipid biosynthetic process [GO:0030148]                                     | 0.002   | IPT1 SKN1 SUR1                                       | 3  | 15  |
| protein refolding [GO:0042026]                                                     | 0.003   | MDJ1 CPR7 SSE1                                       | 3  | 16  |
| polyamine transport [GO:0015846]                                                   | 0.003   | AGP2 PTK2                                            | 2  | 5   |
| ATP synthesis coupled proton transport [GO:0015986]                                | 0.004   | ATP5 ATP7 ATP15                                      | 3  | 17  |
| negative regulation of catalytic activity [GO:0043086]                             | 0.005   | INH1 PRB1                                            | 2  | 6   |
| phosphorylation [GO:0016310]                                                       | 0.006   | VPS15 CHK1 FAB1 HXK2 PFK1 PTK2 VPS34 SKY1 PHO85 THI6 | 10 | 206 |
| phosphatidylinositol phosphorylation [GO:0046854]                                  | 0.009   | FAB1 VPS34                                           | 2  | 8   |
| regulation of establishment or maintenance of cell polarity [GO:0032878]           | 0.002   | PCL2 PHO85                                           | 2  | 4   |
| <b>GO cellular components</b>                                                      |         |                                                      |    |     |
| mitochondrial inner boundary membrane [GO:0097002]                                 | 0.001   | YTA12 MGM1                                           | 2  | 3   |

|                                                                                    |        |                                                             |    |     |
|------------------------------------------------------------------------------------|--------|-------------------------------------------------------------|----|-----|
| mitochondrial proton-transporting ATP synthase, stator stalk [GO:0000274]          | 0.001  | ATP5 ATP7                                                   | 2  | 3   |
| mitochondrial inner membrane [GO:0005743]                                          | 0.002  | COQ1 MSS2 ATP5 FLX1 ATP7 YTA12 ATP25 COX5A ATP23 MGM1 ATP15 | 11 | 204 |
| phosphatidylinositol 3-kinase complex II [GO:0034272]                              | 0.002  | VPS15 VPS34                                                 | 2  | 4   |
| phosphatidylinositol 3-kinase complex I [GO:0034271]                               | 0.002  | VPS15 VPS34                                                 | 2  | 4   |
| clathrin-coated vesicle [GO:0030136]                                               | 0.003  | CHS6 TVP18 LDB19                                            | 3  | 16  |
| cyclin-dependent protein kinase                                                    | 0.004  | PCL2 PHO80 PHO85                                            | 3  | 17  |
| holoenzyme complex [GO:0000307]                                                    |        |                                                             |    |     |
| mitochondrial proton-transporting ATP synthase complex [GO:0005753]                | 0.005  | ATP5 ATP7                                                   | 2  | 6   |
| proton-transporting ATP synthase complex, catalytic core F(1) [GO:0045261]         | 0.005  | ATP5 ATP15                                                  | 2  | 6   |
| extrinsic to mitochondrial inner membrane [GO:0031314]                             | 0.005  | MSS2 MDJ1 MGM1                                              | 3  | 19  |
| mitochondrial inner boundary membrane [GO:0097002]                                 | 0.001  | YTA12 MGM1                                                  | 2  | 3   |
| <b>MIPS functional classification</b>                                              |        |                                                             |    |     |
| energy generation (e.g. ATP synthase) [02.45.15]                                   | 0.0006 | INH1 ATP5 ATP7 ATP15                                        | 4  | 21  |
| vitamine/cofactor transport [20.01.25]                                             | 0.002  | AGP2 FEN2 FLX1                                              | 3  | 14  |
| mitochondrial transport [20.09.04]                                                 | 0.004  | MSS2 ATP5 SMF2 FLX1 ATP7 YTA12 ATP15                        | 7  | 104 |
| electron transport and membrane-associated energy conservation [02.11]             | 0.005  | INH1 ATP5 ATP7 COX5A ATP15                                  | 5  | 58  |
| electron transport [20.01.15]                                                      | 0.005  | INH1 ATP5 ATP7 COX5A GRX5 ATP15                             | 6  | 83  |
| respiration [02.13]                                                                | 0.005  | ATP5 ATP7 IRC21 YTA12 ATP15                                 | 5  | 59  |
| transcription activation [11.02.03.04.01]                                          | 0.008  | THI2 THI3 HAP2 MGA2                                         | 4  | 42  |
| modification by phosphorylation, dephosphorylation, autophosphorylation [14.07.03] | 0.009  | VPS15 SLI15 CHK1 REG1 PTK2 SAP190 VPS34 SKY1 PHO85          | 9  | 186 |
| phospholipid metabolism [01.06.02.01]                                              | 0.010  | COQ1 CST26 IPT1 ISC1 SUR1                                   | 5  | 68  |

**Table S2 Functional enrichment of strains with increased sensitivity to ppdef1 identified with**

### **Funspec**

The fitness score for strains with resistance to Ppdef1 <1.5 was analysed. Number of Genes in each Database: 6603.

**k**: number of genes from the input cluster in given category. **f**: number of genes total in given category. The p-

values represent the probability that the intersection of a given list with any given functional category occurs by chance.

| Category                                                                                               | P value   | In category from cluster                                                                | k  | f   |
|--------------------------------------------------------------------------------------------------------|-----------|-----------------------------------------------------------------------------------------|----|-----|
| <b>GO molecular function</b>                                                                           |           |                                                                                         |    |     |
| phosphatase activator activity [GO:0019211]                                                            | 0.001     | TOF2 WHI2 RRD2                                                                          | 3  | 4   |
| siderophore transmembrane transporter activity [GO:0015343]                                            | 0.004     | ARN1 ARN2                                                                               | 2  | 2   |
| mannan endo-1,6-alpha-mannosidase activity [GO:0008496]                                                | 0.004     | DCW1 DFG5                                                                               | 2  | 2   |
| chitin deacetylase activity [GO:0004099]                                                               | 0.004     | CDA1 CDA2                                                                               | 2  | 2   |
| transferase activity, transferring glycosyl groups [GO:0016757]                                        | 0.004     | PMT2 PMT1 KRE2 DIE2 YUR1<br>PNP1 APT1 ALG9 ALG6 ALG8<br>ALG5 GPH1                       | 12 | 80  |
| <b>GO biological process</b>                                                                           |           |                                                                                         |    |     |
| fungus-type cell wall biogenesis [GO:0009272]                                                          | 2.155e-05 | FLC2 ROT2 RIM101 DCW1<br>DFG5 RIM21                                                     | 6  | 11  |
| ubiquitin-dependent protein catabolic process via the multivesicular body sorting pathway [GO:0043162] | 0.0002    | STP22 VPS25 SNF7 VPS36<br>VPS20 SNF8                                                    | 6  | 15  |
| cellular cell wall organization [GO:0007047]                                                           | 0.0004    | ECM33 SBE2 SMI1 ECM34<br>SBE22 CHS7 DCW1 ECM7<br>GAS3 DFG5 ZDS1 SCW10<br>GAS1 KRE1 WSC3 | 15 | 89  |
| chromatin silencing [GO:0006342]                                                                       | 0.0004    | SPT4 SDS3 CAC2 ZDS1 GAS1<br>HST3                                                        | 6  | 17  |
| negative regulation of transcription from RNA polymerase II promoter by glucose [GO:0000433]           | 0.0005    | MIG2 VPS25 VPS36 SNF8                                                                   | 4  | 7   |
| chitin catabolic process [GO:0006032]                                                                  | 0.001     | CTS2 CDA1 CDA2                                                                          | 3  | 4   |
| polysaccharide catabolic process [GO:0000272]                                                          | 0.002     | CTS2 CDA1 CDA2                                                                          | 3  | 5   |
| protein folding in endoplasmic reticulum [GO:0034975]                                                  | 0.004     | EMC1 EMC4 AIM27 SCJ1                                                                    | 4  | 11  |
| AMP biosynthetic process [GO:0006167]                                                                  | 0.004     | ADO1 APT1                                                                               | 2  | 2   |
| ER-associated misfolded protein catabolic process [GO:0071712]                                         | 0.004     | PMT2 PMT1                                                                               | 2  | 2   |
| carbohydrate catabolic process [GO:0016052]                                                            | 0.004     | DCW1 DFG5                                                                               | 2  | 2   |
| budding cell bud growth [GO:0007117]                                                                   | 0.004     | REI1 BEM2 DCW1 ELM1 DFG5<br>RRT12 TRS85 CTS2 RMD6                                       | 5  | 18  |
| sporulation resulting in formation of a cellular spore [GO:0030435]                                    | 0.005     | IME4 RSC1 SPO11 SSP1 SPO22<br>CDA1 CDA2 VAN1 SSP2<br>RIM20                              | 14 | 103 |
| protein processing [GO:0016485]                                                                        | 0.005     | RIM8 RIM13 DFG16 RIM20<br>ROT2 CTS2 MIG2 PCL7 IMA5                                      | 4  | 12  |
| carbohydrate metabolic process [GO:0005975]                                                            | 0.006     | CDA1 CDA2 YLR446W GAS3<br>SCW10 GAS1 GAL4 GPH1                                          | 13 | 94  |

|                                    |           |                                                                                                                                                                                                                                                                                                                                                                                                                                                                                                                                                                                                                                                                           |     |      |
|------------------------------------|-----------|---------------------------------------------------------------------------------------------------------------------------------------------------------------------------------------------------------------------------------------------------------------------------------------------------------------------------------------------------------------------------------------------------------------------------------------------------------------------------------------------------------------------------------------------------------------------------------------------------------------------------------------------------------------------------|-----|------|
| ascospore formation [GO:0030437]   | 0.009     | IML3 RIM101 SET2 RIM9 IML3<br>RIM101 SET2 RIM9 RIM11<br>YNL194C RIM21 MCK1 SSP2                                                                                                                                                                                                                                                                                                                                                                                                                                                                                                                                                                                           | 9   | 57   |
| <b>GO cellular component</b>       |           |                                                                                                                                                                                                                                                                                                                                                                                                                                                                                                                                                                                                                                                                           |     |      |
| endoplasmic reticulum [GO:0005783] | 5.376e-06 | PMT2 FRT2 ERV46 FLC2 ROT2<br>BSD2 EMC1 CWH43 PMT1<br>TRS85 MSC2 YEA4 YEL043W<br>ERG4 GET1 GUP1 EMC4<br>NNF2 DIE2 CHS7 APQ12 ICE2<br>SCP160 PHO86 SOP4 STE24<br>ILM1 AIM27 GMH1 ERG3<br>ARV1 SUR4 ERV25 SPC2<br>VAN1 ERG5 ERG2 SCJ1<br>SCW10 YNL194C ALG9 MID1<br>COS10 INP54 ALG6 ALG8<br>SEY1 YDC1 ALG5 YPR114W                                                                                                                                                                                                                                                                                                                                                          | 50  | 416  |
| ESCRT II complex [GO:0000814]      | 0.0003    | VPS25 VPS36 SNF8                                                                                                                                                                                                                                                                                                                                                                                                                                                                                                                                                                                                                                                          | 3   | 3    |
| Golgi apparatus [GO:0005794]       | 0.0004    | ERV46 PEP1 APM3 TRS85<br>SBE2 KRE2 GET1 PSD2 APL6<br>YHL017W GOS1 SBE22 GVP36<br>APS3 MTC1 YUR1 ATG27<br>YKL063C TPO5 BCH2 GMH1<br>ARV1 ERV25 VAN1 NPR1<br>GNT1 YDC1                                                                                                                                                                                                                                                                                                                                                                                                                                                                                                      | 27  | 213  |
| membrane [GO:0016020]              | 0.0007    | PMT2 FRT2 ERV46 FLC2 SEO1<br>YAR029W PEP1 FUR4 ECM33<br>AAC3 MTC4 APM3 BSD2<br>LDB16 STP22 EMC1 CWH43<br>CDC50 PMT1 SED1 MSC2<br>PEX5 MFA1 KRE2 YEA4 VAC8<br>AFG3 ERG4 GET1 GUP1 HUR1<br>EMC4 YGR026W NNF2 GTR2<br>DIE2 APL6 DUR3 YHL017W<br>APM2 GOS1 ARN1 ECM34<br>YHL044W ARN2 ANS1 CHS7<br>MTC6 YAP1801 SSP1 TIR3<br>APQ12 GVP36 ICE2 QDR2<br>AXL2 COA1 APS3 SCP160<br>PHO86 TRK1 YUR1 VPS35<br>YJL163C ATG27 SOP4 APL1<br>APS2 OPI3 VPS25 STE24 ILM1<br>VPS70 DCW1 TPO5 STE3<br>AIM27 BCH2 GMH1 RHO4<br>PTR2 SNF7 YLR046C ERG3<br>CSF1 ARV1 SUR4 VPS36 ECM7<br>ERV25 SPC2 TCB3 ALO1<br>VAN1 YMR034C RIM9 VPS20<br>DLT1 YIM1 YMR155W INP2<br>EAR1 ERG2 GAS3 DFG5 GAS1 | 134 | 1671 |

|                                                                                |        |                                                                                                                                                                                                                                                       |    |     |
|--------------------------------------------------------------------------------|--------|-------------------------------------------------------------------------------------------------------------------------------------------------------------------------------------------------------------------------------------------------------|----|-----|
|                                                                                |        | AQR1 YNL194C ALG9 MID1<br>RIM21 KRE1 PDR18 COS10<br>APM4 INP54 WSC3 MCH4<br>ALG6 TIR2 DFG16 ALG8<br>VAM10 VPS17 SEY1 YOR246C<br>TIM18 GNT1 SNF8 NCR1<br>YDC1 ALG5 YPR114W<br>YPR174C                                                                  |    |     |
| endoplasmic reticulum membrane<br>[GO:0005789]                                 | 0.0008 | PMT2 FRT2 ERV46 FLC2<br>EMC1 CWH43 PMT1 MSC2<br>YEA4 GET1 EMC4 NNF2 DIE2<br>CHS7 ICE2 SCP160 SOP4<br>STE24 ILM1 AIM27 GMH1<br>ERG3 ARV1 ERV25 SPC2<br>VAN1 ERG2 ALG9 INP54<br>ALG6 ALG8 SEY1 YDC1 ALG5<br>YPR114W                                     | 35 | 318 |
| AP-2 adaptor complex [GO:0030122]                                              | 0.001  | APL1 APS2 APM4                                                                                                                                                                                                                                        | 3  | 4   |
| AP-3 adaptor complex [GO:0030123]                                              | 0.001  | APM3 APL6 APS3                                                                                                                                                                                                                                        | 3  | 4   |
| cytoplasmic mRNA processing body<br>[GO:0000932]                               | 0.001  | CCR4 DHH1 SBP1 RPB4 POP2<br>VTS1 SYH1                                                                                                                                                                                                                 | 7  | 28  |
| retromer complex [GO:0030904]                                                  | 0.002  | VPS29 VPS35 VPS17                                                                                                                                                                                                                                     | 3  | 5   |
| coated pit [GO:0005905]                                                        | 0.002  | APM2 APL1 APS2 APM4                                                                                                                                                                                                                                   | 4  | 10  |
| intracellular [GO:0005622]                                                     | 0.003  | RPS8A REI1 BRE1 RPP1A<br>TOM1 RML2 RPS26B BEM2<br>HUL5 MIG2 UGA1 RBG2<br>RIM101 OCA5 RTT107 RPS4B<br>RPL34B RPS24B HIS5 RPL40A<br>RPS21B APN1 RHO4 PNP1<br>VPS36 MSS1 MIH1 RPL13B<br>RIM13 RPL9B RPL42A SQS1<br>IRA2 RPS19A RPS7A REV1<br>RPL21B USV1 | 38 | 381 |
| endosome [GO:0005768]                                                          | 0.003  | STP22 CDC50 AGE1 PSD2<br>ARN1 ARN2 VPS29 VPS35<br>VPS25 SNF7 VPS36 VPS20<br>EAR1 VPS17 SNF8                                                                                                                                                           | 15 | 108 |
| chitosan layer of spore wall [GO:0005631]                                      | 0.004  | CDA1 CDA2                                                                                                                                                                                                                                             | 2  | 2   |
| dolichyl-phosphate-mannose-protein<br>mannosyltransferase complex [GO:0031502] | 0.004  | PMT2 PMT1                                                                                                                                                                                                                                             | 2  | 2   |
| ER membrane protein complex [GO:0072546]                                       | 0.004  | EMC1 EMC4 AIM27                                                                                                                                                                                                                                       | 3  | 6   |
| anchored to membrane [GO:0031225]                                              | 0.004  | ECM33 SED1 ANS1 TIR3<br>DCW1 GAS3 DFG5 GAS1<br>KRE1 TIR2                                                                                                                                                                                              | 10 | 61  |
| N-directed glycosylation, deglycosylation<br>[14.07.02.02]                     | 0.0003 | KRE2 DIE2 YUR1 VAN1 SCJ1<br>ALG9 ALG6 ALG8 GNT1<br>ALG5                                                                                                                                                                                               | 10 | 43  |

|                                                                |        |                                                                                                                                                                                                                                                 |    |     |
|----------------------------------------------------------------|--------|-------------------------------------------------------------------------------------------------------------------------------------------------------------------------------------------------------------------------------------------------|----|-----|
| development of asco- basidio- or zygospor<br>[43.01.03.09]     | 0.0007 | ECM33 TRS85 CTS2 IME4<br>RIM101 SSP1 SPO22 SDS3<br>SNF7 CDA1 CDA2 VAN1<br>RIM9 RIM11 RIM13 YNL194C<br>RIM21 MCK1 POP2 SIN3 SSP2<br>RIM20                                                                                                        | 22 | 166 |
| polysaccharide metabolism [01.05.03]                           | 0.001  | SMI1 CDA1 CDA2 MSS11<br>GAS3 SCW10 GAS1 GPH1                                                                                                                                                                                                    | 8  | 35  |
| cell wall [42.01]                                              | 0.002  | ECM33 ROT2 CWH43 SED1<br>SBE2 CTS2 KRE2 YEA4 BEM2<br>SMI1 ECM34 SBE22 CHS7<br>YUR1 HAL5 DCW1 ECM7<br>VAN1 GAS3 DFG5 GAS1<br>ALG9 KRE1 WSC3 DFG16                                                                                                | 25 | 213 |
| transcriptional control [11.02.03.04]                          | 0.006  | CCR4 ROX3 SIF2 CDC50 PHO2<br>INO2 HPR1 ARO80 YHP1<br>UBP3 IME4 MIG2 SPT4 NDT80<br>RTT107 EGD2 DOT5 SDS3<br>TPK1 SET2 YJL206C SPT8<br>HOG1 TOS4 DAT1 SOK2<br>RIM11 MSS11 SPT21 FAP1<br>GIS2 CAF120 CSE2 POP2 SIN3<br>INO4 HST3 ISW2 HHO1<br>HDA3 | 40 | 426 |
| budding, cell polarity and filament<br>formation [43.01.03.05] | 0.007  | RVS161 CDC50 SBE2 BUD16<br>BEM2 BUD27 RIM8 KEL2 GIC1<br>SBE22 YAP1801 AXL2 BNR1<br>TPK1 ACF4 ELM1 RHO4 SUR4<br>SOK2 RIM9 MSS11 DFG5 ZDS1<br>RIM21 DFG16 CKB2 MSB1<br>BFR1 RIM20 CLN2 SRO7                                                       | 31 | 312 |

---
